# Supplementary material for: A review of oligo(arylene ethynylene) derivatives in molecular junctions
Source: Royal Society of Chemistry journal article supplement (doi:10.1039/d1nr02023d), 2021-01-01
Supplement: d1nr02023d1.pdf [file d1nr02023d1.pdf]

There is no supplementary information available for this article.
